# Supplementary material for: Tungsten solubility and speciation in hydrothermal solutions revealed by in situ X-ray absorption spectroscopy
Source: Copernicus journal article supplement (doi:10.5194/ejm-37-111-2025), 2025-02-26
Supplement: Supplementary file 1 [file ejm-37-111-2025-supplement.pdf]

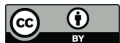

*Supplement of*

## **Tungsten solubility and speciation in hydrothermal solutions revealed by in situ X-ray absorption spectroscopy**

**Manuela Borchert et al.**

*Correspondence to:* Max Wilke ([wilkem@uni-potsdam.de](mailto:wilkem@uni-potsdam.de))

The copyright of individual parts of the supplement might differ from the article licence.

**Supplement. Additional information about thermodynamic modeling of tungsten speciation at hydrothermal conditions.**

**Table S1.** Optimization results for experiments in water (WO<sub>3</sub>), NaCl (WO<sub>2.7</sub> +/- quartz) and HCl solutions (WO<sub>3</sub> and WO<sub>2.7</sub>).

| Reaction                                                                                      | Pressure<br>[bar] | Temperature<br>[°C] | $\Delta G_{i,T,P}^{\circ}$ for aq. species<br>(H <sub>3</sub> WO <sub>4</sub> <sup>+</sup> , HWO <sub>4</sub> <sup>-</sup> ,<br>NaWO <sub>4</sub> <sup>-</sup> ), [kJ/mol] | Error for<br>$\Delta G_{i,T,P}^{\circ}$ ,<br>[kJ/mol] | OptimA program      |                           | OptimC program      |                            |
|-----------------------------------------------------------------------------------------------|-------------------|---------------------|----------------------------------------------------------------------------------------------------------------------------------------------------------------------------|-------------------------------------------------------|---------------------|---------------------------|---------------------|----------------------------|
|                                                                                               |                   |                     |                                                                                                                                                                            |                                                       | log <sub>10</sub> K | log <sub>10</sub> K error | log <sub>10</sub> K | log <sub>10</sub> K error* |
| WO <sub>4</sub> <sup>2-</sup> + 3H <sup>+</sup> = H <sub>3</sub> WO <sub>4</sub> <sup>+</sup> | 400               | 100                 | -989.2                                                                                                                                                                     | 1.0                                                   | 10.43               | 0.14                      | 10.18               | 0.24                       |
|                                                                                               |                   | 200                 | -1000.5                                                                                                                                                                    | 1.3                                                   | 9.61                | 0.14                      | 10.29               | 0.67                       |
|                                                                                               |                   | 300                 | -1030.0                                                                                                                                                                    | 0.6                                                   | 11.39               | 0.05                      | 11.17               | 0.22                       |
|                                                                                               |                   | 350                 | -1045.4                                                                                                                                                                    | 0.5                                                   | 12.65               | 0.04                      | 12.12               | 0.53                       |
|                                                                                               |                   | 400                 | -1057.9                                                                                                                                                                    | 0.3                                                   | 13.85               | 0.02                      | 14.16               | 0.38                       |
| WO <sub>4</sub> <sup>2-</sup> + H <sup>+</sup> = HWO <sub>4</sub> <sup>-</sup>                | 500               | 100                 | -948.6                                                                                                                                                                     | 1.8                                                   | 5.04                | 0.01                      | 4.78                | 0.26                       |
|                                                                                               |                   | 150                 | -955.5                                                                                                                                                                     | 0.4                                                   | 5.11                | 0.01                      | 5.07                | 0.04                       |
|                                                                                               |                   | 200                 | -962.4                                                                                                                                                                     | 2.2                                                   | 5.65                | 0.01                      | 5.41                | 0.24                       |
|                                                                                               |                   | 250                 | -969.1                                                                                                                                                                     | 1.2                                                   | 5.95                | 0.01                      | 5.83                | 0.12                       |
|                                                                                               |                   | 300                 | -975.7                                                                                                                                                                     | 0.3                                                   | 6.34                | 0.01                      | 6.37                | 0.03                       |
| WO <sub>4</sub> <sup>2-</sup> + Na <sup>+</sup> = NaWO <sub>4</sub> <sup>-</sup>              | 400               | 100                 | -1210.665                                                                                                                                                                  | 3.0                                                   | 4.16                | 0.01                      | 4.10                | 0.06                       |
|                                                                                               |                   | 200                 | -1225.431                                                                                                                                                                  | 3.8                                                   | 3.92                | 0.01                      | 4.17                | 0.25                       |
|                                                                                               |                   | 300                 | -1237.679                                                                                                                                                                  | 4.7                                                   | 4.97                | 0.01                      | 4.56                | 0.41                       |
|                                                                                               |                   | 350                 | -1240.357                                                                                                                                                                  | 9.2                                                   | 4.74                | 0.01                      | 4.96                | 0.22                       |

\* errors for equilibrium constants were calculated with OptimA; and as a difference between values of log<sub>10</sub>K optimized with OptimA and OptimC.

**Table S2.** Thermodynamic data for solid phases used in this study and corresponding Maier-Kelly and Holland-Powell equations.

| Source                         | Solid phase                      | T range, [°C] | $\Delta_f G^0_{298}$    | $\Delta_f H^0_{298}$    | $S^0_{298}$                            | $C_p$                                                                                                                                                              |
|--------------------------------|----------------------------------|---------------|-------------------------|-------------------------|----------------------------------------|--------------------------------------------------------------------------------------------------------------------------------------------------------------------|
|                                |                                  |               | [kJ mol <sup>-1</sup> ] | [kJ mol <sup>-1</sup> ] | [J K <sup>-1</sup> mol <sup>-1</sup> ] | [J K <sup>-1</sup> mol <sup>-1</sup> ]                                                                                                                             |
| Zhidikova & Khodakovskiy, 1984 | CaWO <sub>4</sub> scheelite      | 25 – 799.85   | -1533.762               | -1623.0                 | 126.4                                  | 123.1 + (37.7 × 10 <sup>-3</sup> T) – ((17.87 × 10 <sup>5</sup> )/T <sup>2</sup> )                                                                                 |
| Zhidikova & Khodakovskiy, 1984 | FeWO <sub>4</sub> ferberite      | 25 – 1100     | -1072.161               |                         | 132.26                                 | 29.40966 + (11.9001 × 10 <sup>-3</sup> T) – ((4.710803 × 10 <sup>5</sup> )/T <sup>2</sup> )                                                                        |
| Barin, 1995                    | WO <sub>2.72</sub>               | 25 – 926.85   | -708.627                | -781.153                | 68.408                                 | 84.5025 + (12.179 × 10 <sup>-3</sup> T) – ((18.08661 × 10 <sup>5</sup> )/T <sup>2</sup> ) – ((5.5807 × 10 <sup>-2</sup> )/√T)                                      |
| Han et al., 2020               | WO <sub>3</sub> monoclinic(γ)    | 25 – 326.4    | -764.057                | -842.909                | 75.910                                 | 87.54 + (16.35 × 10 <sup>-3</sup> T) – ((17.46 × 10 <sup>5</sup> )/T <sup>2</sup> )                                                                                |
|                                | WO <sub>3</sub> orthorhombic     | 326.4 – 779.2 |                         |                         |                                        | 87.59 + (15.92 × 10 <sup>-3</sup> T) – ((17.64 × 10 <sup>5</sup> )/T <sup>2</sup> )                                                                                |
| SUPCRT, 2007                   | C graphite                       | 25 – 2226.85  | 0                       | 0                       | 5.740                                  | 1.686152 + (4.76976 × 10 <sup>-3</sup> T) – ((8.53536 × 10 <sup>5</sup> )/T <sup>2</sup> )                                                                         |
| Robie & Hemingway, 1995        | SiO <sub>2</sub> trigonal quartz | 25 – 573.85   | -856.3                  | -910.857                | 41.5                                   | 81.145 + (18.28 × 10 <sup>-3</sup> T) – ((1.81 × 10 <sup>5</sup> )/T <sup>2</sup> ) – ((6.985 × 10 <sup>2</sup> )/√T) + (5.406 × 10 <sup>-6</sup> T <sup>2</sup> ) |

**Table S3.** Association constants (log<sub>10</sub> K) for tungsten species under ambient conditions (25 °C, P<sub>sat</sub>) defined in previous studies.

| Equation/ Reference                                                                                     | Yatsimirskii and Romanov, 1965 | Perrin, | Shock et al., | Bychkov and    | Wang et al., | BR model,  |
|---------------------------------------------------------------------------------------------------------|--------------------------------|---------|---------------|----------------|--------------|------------|
|                                                                                                         | Yatsimirskii and Prik, 1964    | 1969    | 1997          | Zuykov, 2005   | 2019         | this study |
| WO <sub>4</sub> <sup>2-</sup> + 2H <sup>+</sup> = H <sub>2</sub> WO <sub>4</sub> <sup>0</sup> (aq)      | 5.851                          | 8.1     |               | 11.14 +/- 0.55 | 6.570        | 8.140      |
| HWO <sub>4</sub> <sup>-</sup> + H <sup>+</sup> = H <sub>2</sub> WO <sub>4</sub> <sup>0</sup> (aq)       | 2.194                          | 3.5     |               | 4.76 +/- 0.15  | 3.157        | 3.403      |
| WO <sub>4</sub> <sup>2-</sup> + H <sup>+</sup> = HWO <sub>4</sub> <sup>-</sup>                          | 3.658                          | 4.6     | 3.592         | 6.38 +/- 0.40  | 3.413        | 4.737      |
| HWO <sub>4</sub> <sup>-</sup> + Na <sup>+</sup> = NaHWO <sub>4</sub> <sup>0</sup> (aq)                  |                                |         |               | -5.11 +/- 0.55 |              | -3.480     |
| WO <sub>4</sub> <sup>2-</sup> + H <sup>+</sup> + Na <sup>+</sup> = NaHWO <sub>4</sub> <sup>0</sup> (aq) |                                |         |               | 1.27 +/- 0.15  |              | 1.257      |

**Table S4.** Association constants ( $\log_{10} K$ ) for tungsten species at hydrothermal *TP* derived from this and previous studies.

|                    | T [°C]                        | 100            | 200                         | 250  | 300  | 350  | 400   | 500  | 600   | P [MPa]  | Method            | Reference            |                         |
|--------------------|-------------------------------|----------------|-----------------------------|------|------|------|-------|------|-------|----------|-------------------|----------------------|-------------------------|
| $\log_{10}K_{III}$ | $H_2WO_4^0 + H^+ = H_3WO_4^+$ | 2.15           | 1.52                        | 1.27 | 1.02 | 0.74 |       |      |       | Sat.     | BR model          | this study           |                         |
|                    |                               | 2.17           | 1.55                        | 1.30 | 1.08 | 0.87 | 0.63  |      |       | 50       | BR model          | this study           |                         |
|                    |                               | 2.19           | 1.57                        | 1.33 | 1.12 | 0.93 | 0.75  | 0.39 | 0.11  | 100      | BR model          | this study           |                         |
| $\log_{10}K_{II}$  | $HWO_4^- + H^+ = H_2WO_4^0$   | 2.80           | 2.63                        | 2.63 | 2.71 | 2.96 |       |      |       |          | Sat.              | BR model             | Wang et al., 2019       |
|                    |                               |                | 4.20                        | 4.10 | 3.90 | 3.90 |       |      |       |          | Sat.              | Calculation          | Heinrich, 1990          |
|                    |                               |                |                             |      | 4.30 |      |       |      |       |          | Sat.              | Calculation          | Gibert et al., 1992     |
|                    |                               |                | 3.85                        | 3.68 | 3.70 | 4.25 |       |      |       |          | Sat.              | BR model             | Wood and Samson, 2000   |
|                    |                               | 3.26           | 3.39                        | 3.56 | 3.84 | 4.44 |       |      |       |          | Sat.              | BR model             | this study              |
|                    |                               |                | 3.56                        |      | 3.39 |      | 3.96  |      |       |          | 50                | Calculation          | Wood and Samson, 2000   |
|                    |                               | 2.76           | 2.57                        | 2.55 | 2.57 | 2.66 | 2.87  |      |       |          | 50                | BR model             | Wang et al., 2019       |
|                    |                               | 3.18           | 3.26                        | 3.39 | 3.57 | 3.86 | 4.36  |      |       |          | 50                | BR model             | this study              |
|                    |                               |                |                             |      |      |      |       | 5.50 |       |          | 100               | Calculation          | Gibert et al., 1992     |
|                    |                               |                | 3.37                        |      | 3.08 |      | 3.14  | 3.57 | 4.16  |          | 100               | Calculation          | Wood and Samson, 2000   |
|                    |                               | 2.72           | 2.52                        | 2.48 | 2.48 | 2.51 | 2.59  | 2.88 | 3.31  |          | 100               | BR model             | Wang et al., 2019       |
|                    |                               | 3.11           | 3.17                        | 3.26 | 3.39 | 3.57 | 3.81  | 4.54 | 5.50  |          | 100               | BR model             | this study              |
|                    |                               | $\log_{10}K_I$ | $WO_4^{2-} + H^+ = HWO_4^-$ | 3.96 | 4.96 | 5.60 | 6.47  | 8.00 |       |          |                   |                      | Sat.                    |
|                    | 5.34                          |                |                             | 6.07 | 6.89 |      |       |      |       |          | Sat.              | Potentiometric study | Wesolowski et al., 1984 |
|                    | 6.31                          |                |                             | 6.79 |      |      |       |      |       |          | Sat.              | UV-vis spectroscopy  | Minubaeva, 2007         |
|                    | 5.40                          |                |                             | 6.10 | 6.90 | 7.70 |       |      |       |          | Sat.              | Calculation          | Heinrich, 1990          |
|                    |                               |                |                             |      | 6.90 |      |       |      |       |          | Sat.              | Calculation          | Gibert et al., 1992     |
| 4.15               | 5.29                          |                |                             | 6.00 | 6.85 | 8.04 |       |      |       |          | Sat.              | HKF model            | Shock et al., 1997      |
| 4.96               | 5.67                          |                |                             | 6.20 | 6.95 | 8.36 |       |      |       |          | Sat.              | BR model             | this study              |
|                    | 5.15                          |                |                             |      | 6.48 |      | 8.10  |      |       |          | 50                | HKF model            | Wood and Samson, 2000   |
| 4.05               | 5.14                          |                |                             | 5.78 | 6.48 | 7.31 | 8.10  |      |       |          | 50                | HKF model            | Shock et al., 1997      |
| 4.78               | 5.41                          |                |                             | 5.83 | 6.37 | 7.11 | 8.28  |      |       |          | 50                | BR model             | this study              |
|                    |                               |                |                             |      |      |      |       | 8.10 |       |          | 100               | Calculation          | Gibert et al., 1992     |
|                    | 5.03                          |                |                             |      | 6.23 |      | 7.58  | 9.17 | 11.10 |          | 100               | HKF model            | Wood and Samson, 2000   |
| 3.98               | 5.02                          |                |                             | 5.61 | 6.23 | 6.88 | 7.58  | 9.17 | 11.09 |          | 100               | HKF model            | Shock et al., 1997      |
| 3.61               | 4.47                          | 4.93           | 5.44                        | 6.03 | 6.73 | 8.63 | 10.98 |      | 100   | BR model | Wang et al., 2019 |                      |                         |
| 4.63               | 5.20                          | 5.56           | 5.97                        | 6.47 | 7.09 | 8.82 | 11.01 |      | 100   | BR model | this study        |                      |                         |

**Table S5.** Association constants for ion pairs of tungsten species with sodium derived from this and previous studies.

|                                  |                                                   | T [°C] | 100   | 200   | 250   | 300   | 350  | 400  | 500  | 600  | P [MPa] | Method                                                                                                                           | Reference                   |
|----------------------------------|---------------------------------------------------|--------|-------|-------|-------|-------|------|------|------|------|---------|----------------------------------------------------------------------------------------------------------------------------------|-----------------------------|
| log <sub>10</sub> K <sub>a</sub> | Na <sup>+</sup> + HWO <sub>4</sub> <sup>-</sup> = |        | -2.60 | -1.41 | -0.83 | -0.22 | 0.47 | 1.26 |      |      | 50      | Approximated<br>by the logK's<br>for K <sup>+</sup> -HSO <sub>4</sub> <sup>2-</sup><br>/SO <sub>4</sub> <sup>2-</sup> -reactions | Wood and<br>Samson,<br>2000 |
|                                  | NaHWO <sub>4</sub> <sup>0</sup>                   |        | -2.66 | -1.49 | -0.94 | -0.40 | 0.15 | 0.73 | 2.15 | 4.03 | 100     |                                                                                                                                  |                             |
| log <sub>10</sub> K <sub>b</sub> | Na <sup>+</sup> + WO <sub>4</sub> <sup>2-</sup> = |        |       | 1.82  |       | 2.72  |      | 3.90 |      |      | 50      | /SO <sub>4</sub> <sup>2-</sup> -reactions                                                                                        | this study                  |
|                                  | NaWO <sub>4</sub> <sup>-</sup>                    |        |       | 1.77  |       | 2.50  |      | 3.41 | 4.59 | 6.11 | 100     |                                                                                                                                  |                             |
|                                  |                                                   |        | 4.18  | 4.29  | 4.49  | 4.83  | 5.55 |      |      |      | Sat.    |                                                                                                                                  |                             |
|                                  |                                                   |        | 4.08  | 4.14  | 4.28  | 4.50  | 4.84 | 5.45 |      |      | 50      |                                                                                                                                  |                             |
|                                  |                                                   | 3.99   | 4.03  | 4.12  | 4.27  | 4.48  | 4.77 | 5.65 | 7.61 | 100  |         |                                                                                                                                  |                             |

**Table S6.** Solubility products for tungsten species derived from this and previous studies (pK = -log<sub>10</sub>K), exp. = experiment.

|                 |                                                                                                      | T [°C] | 100  | 200  | 250  | 300  | 350  | 400  | 500  | 600  | P [MPa]  | Method         | Reference          |                             |
|-----------------|------------------------------------------------------------------------------------------------------|--------|------|------|------|------|------|------|------|------|----------|----------------|--------------------|-----------------------------|
| pK <sub>1</sub> | WO <sub>3</sub> <sup>cryst</sup> + H <sub>2</sub> O = H <sub>2</sub> WO <sub>4</sub> <sup>0</sup>    |        | 6.90 | 5.63 | 5.26 | 4.98 | 4.62 |      |      |      | Sat.     | BR model, exp. | Wang et al., 2019  |                             |
|                 |                                                                                                      |        |      |      | 3.81 | 3.61 | 3.29 |      |      |      |          | Sat.           | BR model           | Wood and Samson, 2000       |
|                 |                                                                                                      |        | 5.43 | 4.16 | 3.74 | 3.36 | 2.79 |      |      |      |          | Sat.           | BR model           | this study                  |
|                 |                                                                                                      |        |      |      |      |      |      |      | 2.55 |      |          | 100            | Solubility exp.    | Wood and Vlassopoulos, 1989 |
|                 |                                                                                                      |        |      |      |      | 4.00 |      | 3.40 | 3.10 | 2.70 |          | 100            | Solubility exp.    | Wood, 1992                  |
|                 |                                                                                                      |        |      |      |      |      |      |      | 2.55 |      |          | 100            | Calculation        | Gibert et al., 1992         |
|                 |                                                                                                      |        |      | 7.02 | 5.77 | 5.42 | 5.17 | 4.97 | 4.80 | 4.50 | 4.60     | 100            | BR model           | Wang et al., 2019           |
|                 |                                                                                                      | 5.61   | 4.38 | 4.01 | 3.73 | 3.47 | 3.20 | 2.55 | 2.18 | 100  | BR model | this study     |                    |                             |
| pK <sub>2</sub> | WO <sub>3</sub> <sup>cryst</sup> + H <sub>2</sub> O = HWO <sub>4</sub> <sup>-</sup> + H <sup>+</sup> |        | 9.51 | 7.93 | 7.50 | 7.31 | 7.54 |      |      |      | Sat.     | HKF model      | Shock et al., 1997 |                             |
|                 |                                                                                                      |        | 9.70 | 8.26 | 7.89 | 7.69 | 7.58 |      |      |      | Sat.     | BR model, exp. | Wang et al., 2019  |                             |
|                 |                                                                                                      |        | 8.70 | 7.55 | 7.30 | 7.21 | 7.23 |      |      |      | Sat.     | BR model       | this study         |                             |
|                 |                                                                                                      |        | 9.38 | 7.73 | 7.22 | 6.86 | 6.63 | 6.54 | 6.83 | 7.81 | 100      | HKF model      | Shock et al., 1997 |                             |
|                 |                                                                                                      |        | 9.74 | 8.29 | 7.90 | 7.65 | 7.49 | 7.39 | 7.38 | 7.92 | 100      | BR model       | Wang et al., 2019  |                             |
|                 |                                                                                                      |        | 8.72 | 7.55 | 7.27 | 7.12 | 7.05 | 7.01 | 7.09 | 7.67 | 100      | BR model       | this study         |                             |

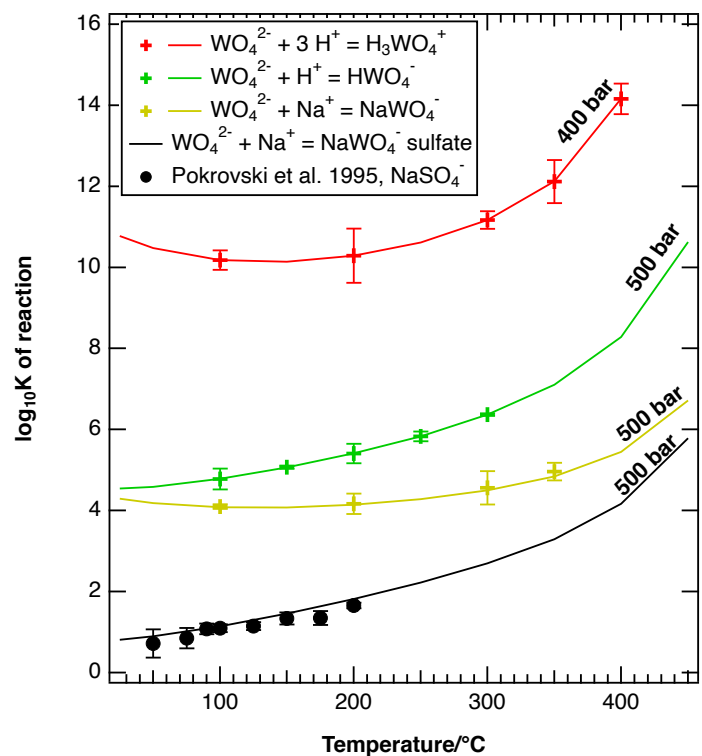

**Figure S1:** Equilibrium constants optimized using the OptimC program. Data points represent the values optimized on the experimental data of this study from Table S1. Lines were calculated using the Bryzgalin-Ryzhenko model (Eq. 4) using the parameters listed in Table 4. The model for the reaction  $\text{SO}_4^{2-} + \text{Na}^+ = \text{NaSO}_4^-$  by Pokrovski et al. (1995) is provided for comparison together with data points.

### References:

Yatsimirskii, K.B., and Prik, K.E.: Kinetics of catalytic oxidation of iodide ion with hydrogen peroxide in the presence of tungsten (VI). *Russ. J. Inorg. Chem.*, 9, 1838-1844, 1964.

Yatsimirskii K.B., and Romanov, V.F.: Complexation between tungsten and molybdenum. *Russ. J. Inorg. Chem.*, 10, 1613-1617, 1965.

All other references see main text.
